# Supplementary material
Source: PubMed Central journal article supplement (PMC3926181)
Supplement: Supp_Fig1.pdf [file Supp_Fig1.pdf]

## Supplementary Data

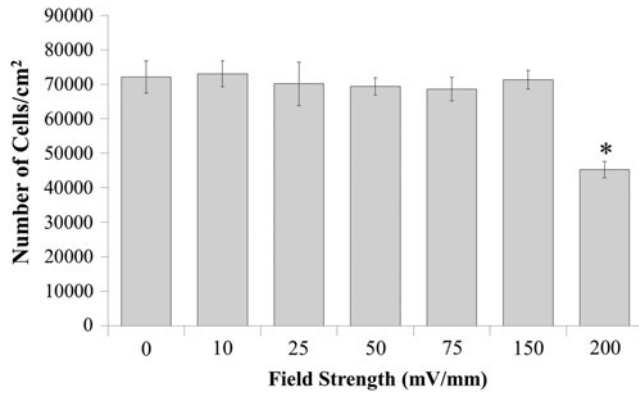

**SUPPLEMENTARY FIG. S1.** Electrical stimulation of Schwann cells results in a similar density ranging from 0–150 mV/mm. At the high end of physiologically reported fields, 200 mV/mm stimulation, we observed a 37.4% decrease in cell number compared with unstimulated (0 mV/mm) paired controls. Schwann cells were electrically stimulated with DC fields ranging from 0 to 200 mV/mm for 8 h with a current of 1 mA.  $n=3$ ,  $*p<0.05$ .
