# Supplementary material
Source: PubMed Central journal article supplement (PMC3926181)
Supplement: Supp_Fig2.pdf [file Supp_Fig2.pdf]

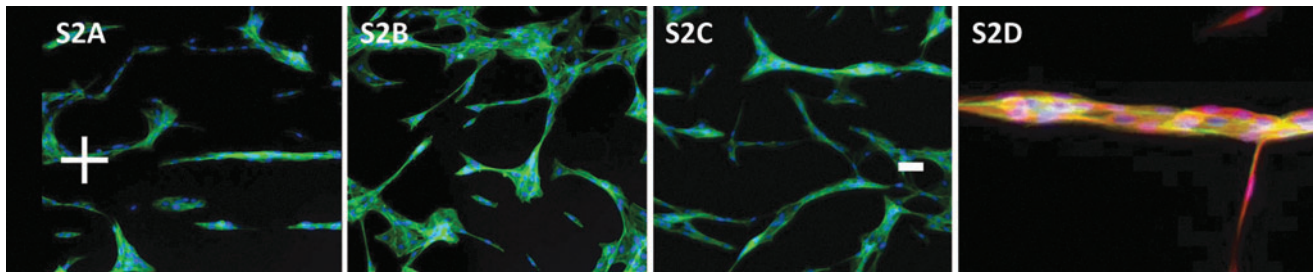

**SUPPLEMENTARY FIG. S2.** Schwann cells exhibit varied degrees of alignment, as well as the presence or absence of compacted cords of cells following electrical stimulation (50 mV/mm). These compacted cellular cords are not observed immediately after stimulation, rather they are prominent after overnight recovery. **(A–C)** There is no anodal or cathodal bias within the chamber and the degree of compacted clusters of cells varies, but is specific to this stimulus magnitude (50 mV/mm). The Schwann cells were stimulated for 8 h at 50 mV/mm, fixed 12 h post stimulation, and stained with phalloidin for actin (green) cytoskeleton and 4',6-diamidino-2-phenylindol (DAPI) for nuclei (blue). **(D)** A magnified view (20 $\times$ ) of a selection of electrically stimulated Schwann cells shows cells have formed a tight cluster of multiple cells with the addition of S100 (red).  $n=3$ , bar=200  $\mu$ m. Direction of the electric field is shown.
