# Supplementary material
Source: PubMed Central journal article supplement (PMC3926181)
Supplement: Supp_Fig3.pdf [file Supp_Fig3.pdf]

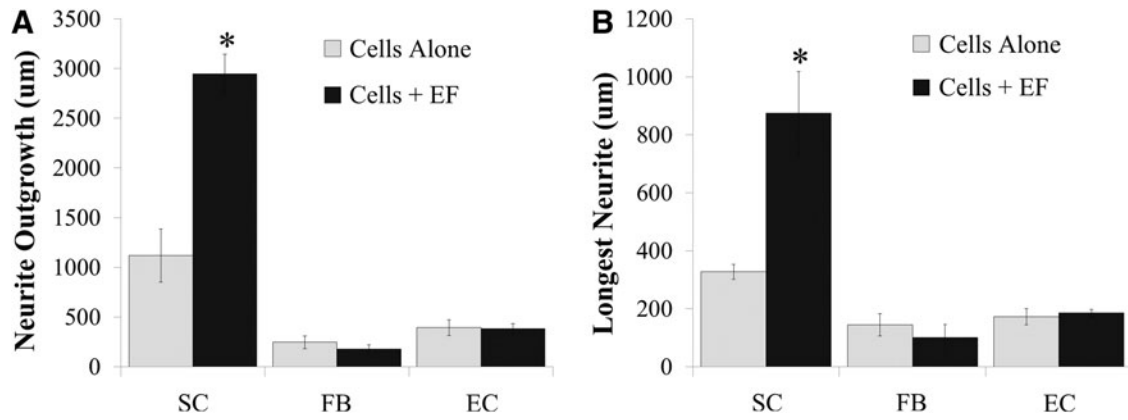

**SUPPLEMENTARY FIG. S3.** Both total neurite outgrowth and longest primary neurite increase on electrically stimulated Schwann cells relative to unstimulated controls and other non-neural support cells. **(A)** Neurite outgrowth is significantly greater on electrically stimulated Schwann, but not on electrically stimulated fibroblasts or endothelial cells. **(B)** Longest neurite is also significantly enhanced on electrically stimulated Schwann cells. Non neuronal support cells were stimulated for 8 h with 50 mV/mm (DC, 0.01 mA) and allowed to recover in new medium overnight before the addition of neurons. \* $p < 0.05$  compared with all conditions,  $n = 3$  for all conditions. Error bars represent standard deviation.
